# Supplementary material
Source: PubMed Central journal article supplement (PMC3848400)

**Supplementary Tables and Figures**

**Table S1.** Association of Net Endogenous Acid Production with Serum Bicarbonate in Participants with Estimated Glomerular Filtration Rate  $\geq 60$  mL/min/1.73m<sup>2</sup>

**Table S2.** Odds Ratio of Acidosis by Net Endogenous Acid Production in Participants with Estimated Glomerular Filtration Rate  $\geq 60$  mL/min/1.73m<sup>2</sup>

**Table S3.** Odds Ratio of Acidosis (defined as serum bicarbonate  $<22$  mEq/L) by Net Endogenous Acid Production

**Table S4.** Association of Animal Protein-Derived Endogenous Acid Production with Serum Bicarbonate

**Table S5.** Association of Animal Protein-Derived Endogenous Acid Production with Serum Bicarbonate within Age Categories

**Table S6.** Association of Dietary Protein with Serum Bicarbonate

**Table S7.** Association of Dietary Potassium with Serum Bicarbonate

**Table S8.** Association of Net Endogenous Acid Production with Serum Bicarbonate After Adjustment for Total Body Fat in 9,499 Participants of NHANES 1999-2004 Who Underwent Dual Energy X-ray Absorptiometry

**Table S9.** Association of Net Endogenous Acid Production with Serum Bicarbonate within Age Categories After Adjustment for Total Body Fat in 9,499 Participants of NHANES 1999-2004 Who Underwent Dual Energy X-ray Absorptiometry

**Figure S1.** Association of estimated animal protein-derived endogenous acid production (ADEAP, mEq/day) with age in 9,781 participants of NHANES 1999-2004.

**Table S1. Association of Net Endogenous Acid Production with Serum Bicarbonate in 8,909 Participants with Estimated Glomerular Filtration Rate  $\geq 60$  mL/min/1.73m<sup>2</sup>**

|                   | Coefficient (95% CI)          |                               |                               |
|-------------------|-------------------------------|-------------------------------|-------------------------------|
|                   | Model 1                       | Model 2                       | Model 3                       |
| <b>NEAP</b>       |                               |                               |                               |
| Continuous*       | <b>-0.22 (-0.28 to -0.16)</b> | <b>-0.20 (-0.27 to -0.14)</b> | <b>-0.15 (-0.21 to -0.10)</b> |
| < 39.3 mEq/d      | [Ref]                         | [Ref]                         | [Ref]                         |
| 39.3 – 52.9 mEq/d | -0.14 (-0.29 to 0.02)         | <b>-0.17 (-0.32 to -0.02)</b> | -0.13 (-0.28 to 0.01)         |
| 53.0 – 69.9 mEq/d | <b>-0.39 (-0.59 to -0.19)</b> | <b>-0.38 (-0.58 to -0.18)</b> | <b>-0.29 (-0.47 to -0.10)</b> |
| $\geq 70.0$ mEq/d | <b>-0.60 (-0.77 to -0.43)</b> | <b>-0.55 (-0.72 to -0.38)</b> | <b>-0.43 (-0.57 to -0.28)</b> |
| P for trend       | <0.001                        | <0.001                        | <0.001                        |

Abbreviations: CI, confidence interval. NEAP, Net Endogenous Acid Production, **Bold** values indicate  $p < 0.05$ .

Model 1: unadjusted

Model 2: adjusted for age, sex, and race/ethnicity

Model 3: Model 2 + adjusted for body mass index, poverty, education, smoking status, diuretic use, diagnosis of diabetes mellitus, hypertension, cardiovascular disease, estimated glomerular filtration rate, log-transformed urine albumin-creatinine ratio, serum albumin and log-transformed C-reactive protein.

\*Per standard deviation higher NEAP (SD = 26.5 mEq/d)

**Table S2. Odds Ratio of Acidosis by Net Endogenous Acid Production in 8,909 Participants with Estimated Glomerular Filtration Rate  $\geq 60$  mL/min/1.73m<sup>2</sup>**

|                   | OR (95% CI)               |                           |                           |
|-------------------|---------------------------|---------------------------|---------------------------|
|                   | Model 1                   | Model 2                   | Model 3                   |
| <b>NEAP</b>       |                           |                           |                           |
| Continuous*       | <b>1.18 (1.08 – 1.29)</b> | <b>1.15 (1.05 – 1.27)</b> | 1.10 (1.00 – 1.22)        |
| < 39.3 mEq/d      | [Ref]                     | [Ref]                     | [Ref]                     |
| 39.3 – 52.9 mEq/d | 1.14 (0.93 – 1.40)        | 1.16 (0.95 – 1.42)        | 1.13 (0.92 – 1.40)        |
| 53.0 – 69.9 mEq/d | <b>1.46 (1.14 – 1.87)</b> | <b>1.43 (1.11 – 1.83)</b> | <b>1.30 (1.02 – 1.66)</b> |
| $\geq 70.0$ mEq/d | <b>1.66 (1.29 – 2.13)</b> | <b>1.54 (1.19 – 2.01)</b> | <b>1.36 (1.05 – 1.75)</b> |
| P for trend       | <0.001                    | 0.002                     | 0.02                      |

Abbreviations: OR, odds ratio; CI, confidence interval. **Bold** values indicate  $p < 0.05$ .

Acidosis defined as serum bicarbonate  $< 23$  mEq/L.

Model 1: unadjusted

Model 2: adjusted for age, sex, and race/ethnicity

Model 3: Model 2 + adjusted for body mass index, poverty, education, smoking status, diuretic use, diagnosis of diabetes mellitus, hypertension, cardiovascular disease, estimated glomerular filtration rate, log-transformed urine albumin-creatinine ratio, serum albumin and log-transformed C-reactive protein.

\*Per standard deviation higher NEAP (SD = 26.5 mEq/d)

**Table S3a. Odds Ratio of Acidosis by Net Endogenous Acid Production in 9,781 Participants of NHANES 1999-2004<sup>†</sup>**

|                   | OR (95% CI)               |                           |                           |
|-------------------|---------------------------|---------------------------|---------------------------|
|                   | Model 1                   | Model 2                   | Model 3                   |
| <b>NEAP</b>       |                           |                           |                           |
| Continuous*       | <b>1.19 (1.07 – 1.32)</b> | <b>1.18 (1.05 – 1.34)</b> | <b>1.15 (1.01 – 1.31)</b> |
| < 39.3 mEq/d      | [Ref]                     | [Ref]                     | [Ref]                     |
| 39.3 – 52.9 mEq/d | 0.92 (0.68 – 1.29)        | 0.95 (0.69 – 1.29)        | 0.95 (0.70 – 1.30)        |
| 53.0 – 69.9 mEq/d | 1.32 (0.95 – 1.82)        | 1.31 (0.94 – 1.81)        | 1.24 (0.90 – 1.70)        |
| ≥ 70.0 mEq/d      | <b>1.45 (1.10 – 1.90)</b> | <b>1.39 (1.02 – 1.89)</b> | 1.28 (0.94 – 1.74)        |
| P for trend       | 0.002                     | 0.02                      | 0.07                      |

**Table S3b. Odds Ratio of Acidosis by Net Endogenous Acid Production in 8,909 Participants with estimated Glomerular Filtration Rate ≥ 60 mL/min/1.73m<sup>2†</sup>**

|                   | OR (95% CI)               |                           |                           |
|-------------------|---------------------------|---------------------------|---------------------------|
|                   | Model 1                   | Model 2                   | Model 3                   |
| <b>NEAP</b>       |                           |                           |                           |
| Continuous*       | <b>1.22 (1.09 – 1.37)</b> | <b>1.20 (1.05 – 1.37)</b> | <b>1.17 (1.02 – 1.34)</b> |
| < 39.3 mEq/d      | [Ref]                     | [Ref]                     | [Ref]                     |
| 39.3 – 52.9 mEq/d | 0.99 (0.70 – 1.41)        | 1.01 (0.70 – 1.46)        | 1.00 (0.69 – 1.43)        |
| 53.0 – 69.9 mEq/d | <b>1.49 (1.03 – 2.14)</b> | <b>1.46 (1.01 – 2.12)</b> | 1.36 (0.95 – 1.94)        |
| ≥ 70.0 mEq/d      | <b>1.61 (1.18 – 2.19)</b> | <b>1.50 (1.06 – 2.13)</b> | 1.37 (0.98 – 1.92)        |
| P for trend       | 0.001                     | 0.01                      | 0.03                      |

Abbreviations: OR, odds ratio; CI, confidence interval. **Bold** values indicate p<0.05.

<sup>†</sup>**Acidosis defined as serum bicarbonate <22 mEq/L.**

Model 1: unadjusted

Model 2: adjusted for age, sex, and race/ethnicity

Model 3: Model 2 + adjusted for body mass index, poverty, education, smoking status, diuretic use, diagnosis of diabetes mellitus, hypertension, cardiovascular disease, estimated glomerular filtration rate, log-transformed urine albumin-creatinine ratio, serum albumin and log-transformed C-reactive protein.

\*Per standard deviation higher NEAP (SD for Table S3a = 26.4 mEq/d; Table S3b = 26.5 mEq/d)

**Table S4. Association of Animal Protein-Derived Endogenous Acid Production with Serum Bicarbonate in 9,781 Participants of NHANES 1999-2004**

|                   | Coefficient (95% CI)          |                               |                               |
|-------------------|-------------------------------|-------------------------------|-------------------------------|
|                   | Model 1                       | Model 2                       | Model 3                       |
| <b>ADEAP</b>      |                               |                               |                               |
| Continuous*       | <b>-0.12 (-0.20 to -0.04)</b> | <b>-0.14 (-0.23 to -0.06)</b> | <b>-0.11 (-0.18 to -0.03)</b> |
| < 1.6 mEq/d       | [Ref]                         | [Ref]                         | [Ref]                         |
| 1.6 – 15.5 mEq/d  | -0.03 (-0.21 to 0.26)         | -0.03 (-0.25 to 0.19)         | -0.05 (-0.26 to 0.19)         |
| 15.6 – 32.9 mEq/d | -0.02 (-0.26 to 0.22)         | -0.09 (-0.32 to 0.14)         | -0.09 (-0.30 to 0.12)         |
| > 32.9 mEq/d      | <b>-0.31 (-0.56 to -0.07)</b> | <b>-0.38 (-0.62 to -0.14)</b> | <b>-0.28 (-0.50 to -0.05)</b> |
| P for trend       | 0.01                          | 0.01                          | 0.02                          |

Abbreviation: CI, confidence interval; ADEAP, Animal Protein Derived-Endogenous Acid Production. **Bold** values indicate  $p < 0.05$ .

Model 1: unadjusted

Model 2: adjusted for age, sex, and race/ethnicity

Model 3: Model 2 + adjusted for body mass index, poverty, education, smoking status, diuretic use, diagnosis of diabetes mellitus, hypertension, cardiovascular disease, estimated glomerular filtration rate, log-transformed urine albumin-creatinine ratio, serum albumin and log-transformed C-reactive protein.

\*Per standard deviation higher ADEAP (SD = 26.2 mEq/d)

**Table S5. Association of Animal Protein-Derived Endogenous Acid Production with Serum Bicarbonate within Age Categories**

| Age 20 to 39 years      | Coefficient (95% CI)          |                               |                               |
|-------------------------|-------------------------------|-------------------------------|-------------------------------|
|                         | Model 1                       | Model 2                       | Model 3                       |
| <b>ADEAP (n = 3299)</b> |                               |                               |                               |
| Continuous*             | 0.02 (-0.10 to 0.13)          | -0.06 (-0.18 to 0.05)         | -0.04 (-0.14 to 0.07)         |
| < 1.6 mEq/d             | [Ref]                         | [Ref]                         | [Ref]                         |
| 1.6 – 15.5 mEq/d        | 0.04 (-0.34 to 0.42)          | -0.03 (-0.39 to 0.32)         | -0.03 (-0.35 to 0.28)         |
| 15.6 – 32.9 mEq/d       | 0.13 (-0.24 to 0.49)          | -0.05 (-0.39 to 0.28)         | -0.02 (-0.31 to 0.27)         |
| > 32.9 mEq/d            | -0.05 (-0.39 to 0.29)         | -0.27 (-0.60 to 0.05)         | -0.17 (-0.46 to 0.11)         |
| P for trend             | 0.83                          | 0.12                          | 0.24                          |
| <hr/>                   |                               |                               |                               |
| Age 40 to 59 years      | Coefficient (95% CI)          |                               |                               |
|                         | Model 1                       | Model 2                       | Model 3                       |
| <b>ADEAP (n = 3139)</b> |                               |                               |                               |
| Continuous*             | <b>-0.19 (-0.30 to -0.09)</b> | <b>-0.25 (-0.35 to -0.14)</b> | <b>-0.20 (-0.31 to -0.08)</b> |
| < 1.6 mEq/d             | [Ref]                         | [Ref]                         | [Ref]                         |
| 1.6 – 15.5 mEq/d        | 0.05 (-0.30 to 0.39)          | 0.01 (-0.35 to 0.31)          | -0.001 (-0.33 to 0.33)        |
| 15.6 – 32.9 mEq/d       | 0.02 (-0.32 to 0.36)          | -0.08 (-0.41 to 0.24)         | -0.05 (-0.37 to 0.27)         |
| > 32.9 mEq/d            | <b>-0.37 (-0.73 to -0.01)</b> | -0.52 (-0.87 to 0.17)         | <b>-0.41 (-0.77 to -0.05)</b> |
| P for trend             | 0.04                          | 0.01                          | 0.02                          |
| <hr/>                   |                               |                               |                               |
| Age ≥ 60 years          | Coefficient (95% CI)          |                               |                               |
|                         | Model 1                       | Model 2                       | Model 3                       |
| <b>ADEAP (n = 3343)</b> |                               |                               |                               |
| Continuous*             | <b>-0.15 (-0.28 to -0.01)</b> | -0.14 (-0.28 to 0.003)        | -0.10 (-0.24 to 0.03)         |
| < 1.6 mEq/d             | [Ref]                         | [Ref]                         | [Ref]                         |
| 1.6 – 15.5 mEq/d        | -0.08 (-0.33 to 0.18)         | -0.07 (-0.32 to 0.18)         | -0.09 (-0.32 to 0.13)         |
| 15.6 – 32.9 mEq/d       | -0.22 (-0.46 to 0.03)         | -0.19 (-0.44 to 0.06)         | -0.19 (-0.42 to 0.03)         |
| > 32.9 mEq/d            | <b>-0.35 (-0.66 to -0.04)</b> | -0.33 (-0.65 to 0.001)        | -0.22 (-0.54 to 0.09)         |
| P for trend             | 0.02                          | 0.04                          | 0.10                          |

Abbreviation: CI, confidence interval; ADEAP, Animal Protein Derived Endogenous Acid Production. **Bold** values indicate  $p < 0.05$ .

P for interaction by age = 0.01

Model 1: unadjusted

Model 2: adjusted for age, sex, and race/ethnicity

Model 3: Model 2 + adjusted for body mass index, poverty, education, smoking status, diuretic use, diagnosis of diabetes mellitus, hypertension, cardiovascular disease, estimated glomerular filtration rate, log-transformed urine albumin-creatinine ratio, serum albumin and log-transformed C-reactive protein.

\*Per standard deviation higher ADEAP (SD = 26.2 mEq/d)

**Table S6. Association of Dietary Protein with Serum Bicarbonate in 9,781 Participants of NHANES 1999-2004**

|                        | Coefficient (95% CI)  |                       |                               |
|------------------------|-----------------------|-----------------------|-------------------------------|
|                        | Model 1               | Model 2               | Model 3                       |
| <b>Dietary Protein</b> |                       |                       |                               |
| Continuous*            | -0.02 (-0.12 to 0.08) | -0.09 (-0.20 to 0.02) | -0.10 (-0.22 to 0.01)         |
| ≤54.5 g/day            | [Ref]                 | [Ref]                 | [Ref]                         |
| 54.5 – 76.6 g/day      | -0.04 (-0.19 to 0.12) | -0.07 (-0.22 to 0.09) | -0.11 (-0.27 to 0.05)         |
| 76.7 – 103.7 g/day     | -0.03 (-0.22 to 0.16) | -0.12 (-0.31 to 0.06) | -0.15 (-0.34 to 0.03)         |
| ≥103.7 g/day           | -0.02 (-0.26 to 0.21) | -0.18 (-0.44 to 0.07) | <b>-0.23 (-0.50 to -0.04)</b> |
| P for trend            | 0.83                  | 0.12                  | 0.09                          |

Abbreviation: CI, confidence interval, **Bold** values indicate  $p < 0.05$ .

Model 1: adjusted for dietary energy

Model 2: adjusted for age, sex, race/ethnicity and dietary energy

Model 3: Model 2 + adjusted for body mass index, poverty, education, smoking status, diuretic use, diagnosis of diabetes mellitus, hypertension, cardiovascular disease, estimated glomerular filtration rate, log-transformed urine albumin-creatinine ratio, serum albumin and log-transformed C-reactive protein.

\*Per standard deviation higher dietary protein (SD = 42.4 g/day)



**Table S7. Association of Dietary Potassium with Serum Bicarbonate in 9,781 Participants of NHANES 1999-2004**

|                          | Coefficient (95% CI)       |                            |                            |
|--------------------------|----------------------------|----------------------------|----------------------------|
|                          | Model 1                    | Model 2                    | Model 3                    |
| <b>Dietary Potassium</b> |                            |                            |                            |
| Continuous*              | <b>0.32 (0.23 to 0.42)</b> | <b>0.16 (0.08 to 0.25)</b> | <b>0.14 (0.05 to 0.24)</b> |
| <47.4 mEq/d              | [Ref]                      | [Ref]                      | [Ref]                      |
| 47.4 – 66.7 mEq/d        | <b>0.31 (0.16 to 0.46)</b> | <b>0.19 (0.04 to 0.34)</b> | 0.09 (-0.05 to 0.22)       |
| 66.8 – 89.4 mEq/d        | <b>0.46 (0.29 to 0.62)</b> | <b>0.29 (0.13 to 0.45)</b> | <b>0.17 (0.01 to 0.33)</b> |
| ≥ 89.5 mEq/d             | <b>0.78 (0.51 to 1.04)</b> | <b>0.52 (0.24 to 0.79)</b> | <b>0.30 (0.05 to 0.55)</b> |
| P for trend              | <0.001                     | 0.001                      | 0.01                       |

Abbreviation: CI, confidence interval, **Bold** values indicate  $p < 0.05$ .

Model 1: adjusted for dietary energy

Model 2: adjusted for age, sex, race/ethnicity and dietary energy

Model 3: Model 2 + adjusted for body mass index, poverty, education, smoking status, diuretic use, diagnosis of diabetes mellitus, hypertension, cardiovascular disease, estimated glomerular filtration rate, log-transformed urine albumin-creatinine ratio, serum albumin and log-transformed C-reactive protein.

\*Per standard deviation higher dietary potassium (SD = 32.9 mEq/d)

**Table S8. Association of Net Endogenous Acid Production with Serum Bicarbonate After Adjustment for Total Body Fat in 9,499 Participants of NHANES 1999-2004 Who Underwent Dual Energy X-ray Absorptiometry**

|                   | Coefficient (95% CI)          |                               |                               |
|-------------------|-------------------------------|-------------------------------|-------------------------------|
|                   | Model 1                       | Model 2                       | Model 3                       |
| <b>NEAP</b>       |                               |                               |                               |
| Continuous*       | <b>-0.15 (-0.21 to -0.10)</b> | <b>-0.15 (-0.21 to -0.10)</b> | <b>-0.15 (-0.21 to -0.09)</b> |
| < 39.3 mEq/d      | [Ref]                         | [Ref]                         | [Ref]                         |
| 39.3 – 52.9 mEq/d | -0.10 (-0.25 to 0.04)         | -0.12 (-0.27 to 0.02)         | -0.11 (-0.26 to 0.04)         |
| 53.0 – 69.9 mEq/d | <b>-0.25 (-0.44 to -0.07)</b> | <b>-0.26 (-0.45 to -0.08)</b> | <b>-0.25 (-0.44 to -0.06)</b> |
| ≥ 70.0 mEq/d      | <b>-0.42 (-0.57 to -0.28)</b> | <b>-0.43 (-0.58 to -0.28)</b> | <b>-0.42 (-0.56 to -0.27)</b> |
| P for trend       | <0.001                        | <0.001                        | <0.001                        |

Abbreviation: CI, confidence interval. NEAP, Net Endogenous Acid Production,

**Bold** values indicate  $p < 0.05$ .

Model 1: adjusted for age, sex, race/ethnicity, **body mass index**, poverty, education, smoking status, diuretic use, diagnosis of diabetes mellitus, hypertension, cardiovascular disease, estimated glomerular filtration rate, log-transformed urine albumin-creatinine ratio, serum albumin and log-transformed C-reactive protein.

Model 2: adjusted for age, sex, race/ethnicity, **% total body fat**, poverty, education, smoking status, diuretic use, diagnosis of diabetes mellitus, hypertension, cardiovascular disease, estimated glomerular filtration rate, log-transformed urine albumin-creatinine ratio, serum albumin and log-transformed C-reactive protein.

Model 3: Model 1 + adjusted for **% total body fat**

\*Per standard deviation higher NEAP (SD =26.5 mEq/d)

**Table S9. Association of Net Endogenous Acid Production with Serum Bicarbonate within Age Categories After Adjustment for Total Body Fat in 9,499 Participants of NHANES 1999-2004 Who Underwent Dual Energy X-ray Absorptiometry**

|                   | Coefficient (95% CI)       |                               |                               |
|-------------------|----------------------------|-------------------------------|-------------------------------|
|                   | 20 to 39 years<br>(n=3211) | 40 to 59 years<br>(n=3060)    | ≥ 60 years (n=3228)           |
| <b>NEAP</b>       |                            |                               |                               |
| Continuous*       | -0.07 (-0.15 to 0.02)      | <b>-0.28 (-0.39 to -0.18)</b> | <b>-0.17 (-0.30 to -0.04)</b> |
| < 39.3 mEq/d      | [Ref]                      | [Ref]                         | [Ref]                         |
| 39.3 – 52.9 mEq/d | -0.10 (-0.41 to 0.20)      | -0.13 (-0.42 to 0.16)         | -0.13 (-0.42 to 0.15)         |
| 53.0 – 69.9 mEq/d | -0.14 (-0.42 to 0.14)      | <b>-0.38 (-0.66 to -0.09)</b> | -0.18 (-0.44 to 0.07)         |
| ≥ 70.0 mEq/d      | -0.24 (-0.49 to 0.001)     | <b>-0.67 (-0.99 to -0.35)</b> | <b>-0.50 (-0.85 to -0.16)</b> |
| P for trend       | 0.05                       | <0.001                        | 0.01                          |

Abbreviation: CI, confidence interval. NEAP, Net Endogenous Acid Production, **Bold** values indicate p<0.05.

P for interaction by age = 0.004

Models adjusted for age, sex, race/ethnicity, % **total body fat**, poverty, education, smoking status, diuretic use, diagnosis of diabetes mellitus, hypertension, cardiovascular disease, estimated glomerular filtration rate, log-transformed urine albumin-creatinine ratio, serum albumin and log-transformed C-reactive protein.

\*Per standard deviation higher NEAP (SD = 26.5 mEq/d)

**Figure S1. Association of estimated animal protein-derived endogenous acid production (ADEAP, mEq/day) with age in 9,781 participants of NHANES 1999-2004.** Each bar represents an ADEAP quartile. Error bars represent standard errors.

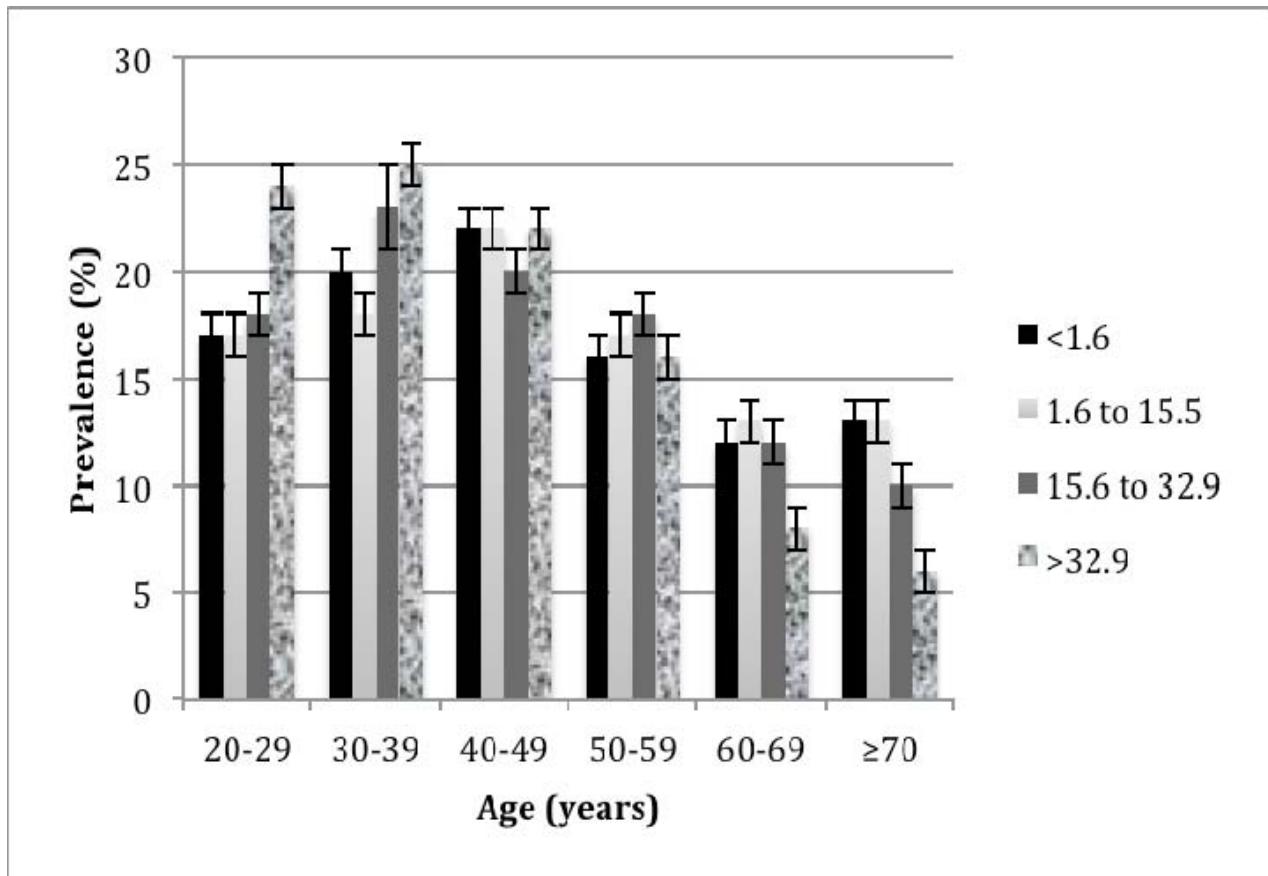

Supplement: CJN.03600413_CJN03600413SupplementaryData.pdf [file CJN.03600413_CJN03600413SupplementaryData.pdf]
